# Supplementary material for: EpiFactors 2022: expansion and enhancement of a curated database of human epigenetic factors and complexes
Source: PubMed Central journal article supplement — Nucleic Acids Res. 2022 Nov 9;51(D1):D564–70. doi: 10.1093/nar/gkac989 (PMC9825597; doi:10.1093/nar/gkac989), 2022-11-09
Supplement: gkac989_supplemental_file.pdf [file gkac989_supplemental_file.pdf]

**SUPPLEMENTAL:**

**Figure S1. Structure of the updated database.**

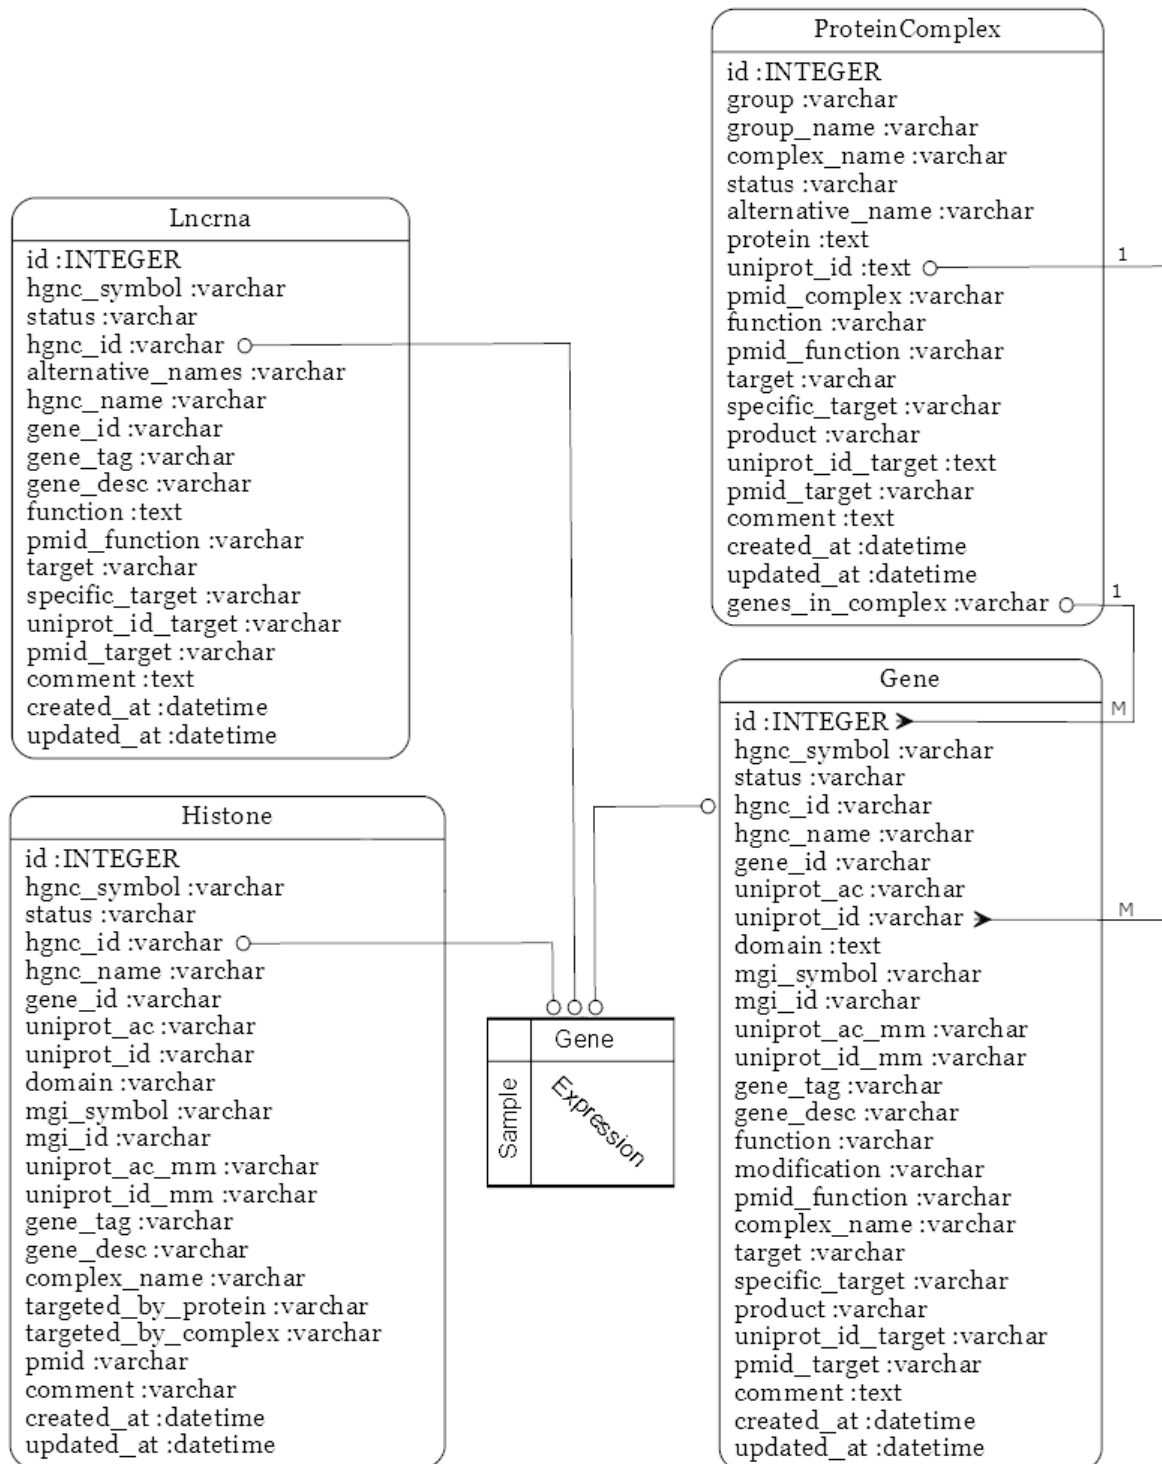

**Table S1. lncRNAs added to the database according to their functions.**

| <b>Function</b>                 | <b>lncRNAs</b>                                                                                                                                                                                                                                      |
|---------------------------------|-----------------------------------------------------------------------------------------------------------------------------------------------------------------------------------------------------------------------------------------------------|
| Chromatin remodeler recruitment | CDKN2B-AS1, DGCR5, LINC00163, HAND2-AS1, KDM2B-DT, DLEU1, NEXN-AS1, BAALC-AS1, WSPAR, MANTIS, lincRNA-Cox2, NMR, BlackMamba, lincRNA-Cox2, KCNQ1OT1                                                                                                 |
| Histone modifier recruitment    | TARID, UMLILO, COR1, RASSF1-AS1, CCAT1, MAGI2-AS3, LINC00968, MEG3, LINC00511, DANCR, PVT1, XIST, HOTAIR, CDKN2B-AS1, AIRN, HOTTIP, NEAT1, MALAT1, FIRRE, IL-7-AS, Khps1, ecCEBPA, SWINGN, PARTICL, DN3OS, TUG1, BLACAT1, LINC00702, MEG3, KCNQ1OT1 |
| DNA modifier recruitment        | KCNQ1OT1, DALIR, ecCEBPA, MEG3, TARID, TP53, COR1                                                                                                                                                                                                   |
| TF recruitment                  | DN3OS, MEG3, MTA2TR, Braveheart                                                                                                                                                                                                                     |
| Splicing factor recruitment     | FAS-AS1, MEG3, CircSMARCA5, Lnc-Spry1, AC091729, sno-lncRNAs (1-5) from the PWS critical region of chr15                                                                                                                                            |
| Protein sequestration           | LNCPRESS1, LINC01133, FOXD3-AS1, PANDAR, NORAD, Linc-YY1, SPAs from the imprinted region 15q11-q13                                                                                                                                                  |
| Modulation of protein functions | NKILA, SAMMSON, DINOL, DDX11-AS1, MIAT, LASTR, HELLPAR, DSCAM-AS1, ZNF674-AS1, JPX, PTCSC3, LNCBRM, MANTIS, LCTS5, lncAKHE, CCAT1, uc.291                                                                                                           |
| miRNA sponging                  | GNAS-AS1, DN3OS, PPP1R10, RMRP, TUG1, SNHG14, BLACAT1, LINC00702, MAGI2-AS3, LINC00968, MEG3, LINC00511, NR2F1-AS1, SBF2-AS1, NORAD, MAPKAPK5-AS1, FGD5-AS1, A1BG-AS1, PVT1, LINC00963, CD27-AS1, EMX2OS, ZNF674-AS1, JPX, CASC15,                  |

|                                      |                                                                                                                                                                                                                                  |
|--------------------------------------|----------------------------------------------------------------------------------------------------------------------------------------------------------------------------------------------------------------------------------|
|                                      | SPAG5-AS1, LINC00899, LINC00668, MATN1-AS1, LINC01410, SNHG15, ARAP1-AS1                                                                                                                                                         |
| RNA binding                          | UCHL1-DT, PCGEM1, FAS-AS1, ZEB2-AS1, uc.57, NCYM NAT, 51A, 17A                                                                                                                                                                   |
| Chromatin looping                    | NRIP1e eRNA, CCAT1, HPSE eRNA                                                                                                                                                                                                    |
| Promoter switching                   | Antisense transcript at each Pcdha first exon                                                                                                                                                                                    |
| Transcription machinery interference | AIRN, transcript from DHFR minor promoter                                                                                                                                                                                        |
| Protein binding                      | TINCR, EMX2OS, DRAIC, MVIH, TP53COR1                                                                                                                                                                                             |
| Undefined                            | CHASERR, SCHLAP1, LUCAT1, TMCC1-DT, BOLA3-DT, RAB30-DT, LINC00862, LINC01503, SERTAD4-AS1, AC005592.2, RP11-395B7.4, RP11-221N13.3, RP6-99M1.2, RP11-660L16.2, RP11-539L10.3, RP6-109B7.3, AC016747.3, RP11-137L10.6, RP11-38L15 |

**Table S2. lncRNAs added to the database according to the functions of their targets.**

| <b>lncRNAs</b>                                                                                                                                             | <b>Target proteins</b>               | <b>Function of target proteins</b> |
|------------------------------------------------------------------------------------------------------------------------------------------------------------|--------------------------------------|------------------------------------|
| BlackMamba, DDX11-AS1                                                                                                                                      | HELLS, DDX11                         | DNA helicases                      |
| DALIR, MEG3, TP53COR1, KCNQ1OT1, ecCEBPA                                                                                                                   | DNMT1                                | DNA methylation                    |
| TARID                                                                                                                                                      | GADD45A                              | DNA demethylation                  |
| AIRN, BLACAT1, CDKN2B-AS1, DANCR, HOTAIR, HOTTIP, Linc-YY1, LINC00511, LINC00702, LINC00968, MALAT1, MEG3, NEAT1, PVT1, RASSF1-AS1, TUG1, UMLILO, KCNQ1OT1 | PRC (EZH2, EHMT2, YY1, SUZ12), KMT2A | Histone methylation                |
| HOTTIP, UMLILO                                                                                                                                             | WDR5                                 | Histone methylation reader         |
| DNM3OS, MAGI2-AS3, LINC00511                                                                                                                               | KDM1A, KDM6B                         | Histone demethylation              |
| IL-7-AS, Khps1, lncAKHE, NEAT1                                                                                                                             | EP300, CREBBP, EP400, TRRAP, YETS4   | Histone acetylation                |
| LNCPRESS1                                                                                                                                                  | SIRT6                                | Histone deacetylation              |

|                                                                                                                                                                                                    |                                                                                                                                       |                   |
|----------------------------------------------------------------------------------------------------------------------------------------------------------------------------------------------------|---------------------------------------------------------------------------------------------------------------------------------------|-------------------|
| DRAIC, HAND2-AS1, LCTS5                                                                                                                                                                            | UCHL5, INO80                                                                                                                          | Ino80 compounds   |
| DLEU1, KDM2B-DT, NEXN-AS1, NMR                                                                                                                                                                     | SMARCA1, SRCAP, SATB1, BAZ1A, BPTF                                                                                                    | ISWI compounds    |
| BAALC-AS1, DGCR5, DLEU1, LINC00163, lincRNA-Cox2, LNCBRM, MANTIS, MVIH, SWINGN, uc.291, WSPAR                                                                                                      | SMARCA4, ARID1A, SMARCA1, MyBBP1A, SMARCA2, SMARCA4, ACTL6A, SMARCA4, SMARCC2, SNF5                                                   | SWI/SNF compounds |
| Braveheart, CCAT1, DINOL, FIRRE, LINC00968, MEG3, MTA2TR, PANDAR, MIAT                                                                                                                             | CNBP, CTCF, TP53, HEY1, KLF4, ATF3, NF-YA, SF1                                                                                        | TF                |
| FIRRE, HPSE eRNA, NRIP1e eRNA, MEG3                                                                                                                                                                | hnRNPU, STAG1, STAG2, PTBP3                                                                                                           | Looping factors   |
| AC091729, CIrcSMARCA5, EMX2OS, FAS-AS1, HELLPAR, LASTR, LINC01133, Lnc-Spry1, MEG3, MIAT, sno-lncRNAs (1-5) from the PWS critical region of chr15, SPAs from the imprinted region 15q11-q13, TINCR | SRSF2, SRSF1, FUS, SPF45, YBX1, PCBP1, PCBP2, RPS6, RPL7, SART3, SRSF6, U2AF65, PTBP3, CELF3, QKI, FOX2, hnRNPM, RBFOX2, TDP43, STAU1 | Splicing factors  |

**Table S3. Proteins added to the database according to their functions.**

| <b>Function</b>             | <b>Modification</b>      | <b>Proteins</b>                                                                                                                                                                                                                                                                                                                  |
|-----------------------------|--------------------------|----------------------------------------------------------------------------------------------------------------------------------------------------------------------------------------------------------------------------------------------------------------------------------------------------------------------------------|
| Chromatin remodeling        | #                        | MIS18A, MIS18BP1, OIP5                                                                                                                                                                                                                                                                                                           |
| TF                          | #                        | HSFX3, KLF18                                                                                                                                                                                                                                                                                                                     |
| Histone modification eraser | Histone deubiquitination | MPND                                                                                                                                                                                                                                                                                                                             |
| Histone modification writer | Histone methylation      | NTMT1, METTL11B                                                                                                                                                                                                                                                                                                                  |
| Protein modification        | Protein methylation      | METTL21A, EEF1AKMT3, EEF1AKMT4, EEF1AKNMT                                                                                                                                                                                                                                                                                        |
| DNA modification            | DNA demethylation        | ALKBH4                                                                                                                                                                                                                                                                                                                           |
| RNA modification            | RNA demethylation        | ALKBH1, ALKBH5, FTO                                                                                                                                                                                                                                                                                                              |
|                             | RNA methylation          | CBLL1, METTL14, METTL16, METTL3, METTL4, NSUN2, NSUN6, RBM15, RBM15B, VIRMA, WTAP, ZC3H13                                                                                                                                                                                                                                        |
|                             | RNA acetylation          | NAT10                                                                                                                                                                                                                                                                                                                            |
|                             | RNA degradation          | THRAP3, RBM7                                                                                                                                                                                                                                                                                                                     |
|                             | RNA pseudouridination    | RPUSD3, TRUB2                                                                                                                                                                                                                                                                                                                    |
|                             | Alternative splicing     | ACINU, CELF1, CELF2, CELF3, CELF4, CELF5, CELF6, DDX17, DDX5, DHX9, EIF4A3, HNRNPU, HNRPL, HNRPM, KHDRBS1, MAGOH, MBNL1, MBNL3, NSRP1, NUP98, PQBP1, PTBP1, PUF60, RBFOX1, RBM11, RBM17, RBM24, RBM25, RBM4, RBM5, RBM8A, RBMY1A1, RFOX1, RNPS1, RSRC1, SFSWAP, SLU7, SRRM4, SRSF10, SRSF12, SRSF6, TRA2B, U2AF2, YTHDC1, ZBTB7A |

**Table S4. Protein complexes added to the database.**

| <b>Complex name</b>                                   | <b>Protein</b>                               | <b>Function</b>                | <b>Target (modification)</b>    | <b>Comment</b>                                                                                                                                                                                                                                                                                                                                                      |
|-------------------------------------------------------|----------------------------------------------|--------------------------------|---------------------------------|---------------------------------------------------------------------------------------------------------------------------------------------------------------------------------------------------------------------------------------------------------------------------------------------------------------------------------------------------------------------|
| MSL histone acetyltransferase complex                 | MSL1, MSL2, MSL3, KAT8 (hMOF)                | histone acetylation complex    | Histone H4 (H4K16Ac)            | Responsible for genome-wide H4K16 acetylation. Affects chromatin organization and regulates transcription. Involved in regulation of cell cycle progression, DNA damage repair and apoptosis.                                                                                                                                                                       |
| WMM (WTAP-METTTL3-METTTL14) methyltransferase complex | METTTL3, METTTL14, WTAP, ZC3H13, CBL1, VIRMA | RNA methylation                | Adenosines of RNA and DNA (m6A) | Regulates processes dependent on RNA stability as m6A methylation leads to RNA degradation. Controls cell differentiation of embryonic and hematopoietic stem cells by destabilization of transcripts. Involved in response to DNA-damage. Mediates random X-inactivation by methylation of Xist-RNA. Marks primary microRNAs for processing. Promotes translation. |
| Mis18                                                 | MIS18A, OIP5, MIS18BP1                       | Chromatin remodeling           | Histone variant CENPA           | Regulates CENPA recruitment to centromeres and thereby normal chromosome segregation during mitosis. Interacts with DNMT3A/3B and provides its centromeric localization regulating epigenetic states of centromeric chromatin. Provides access of CENPA-specific chaperone HJURP to centromeres.                                                                    |
| CUL4-DDB-ROC1 (CUL4-DDB-RBX1)                         | DDB2, DDB1, RBX1, CUL4B, CUL4A               | Histone ubiquitination complex | Histones                        | Recognises UV-induced cyclobutane pyrimidine dimers in chromatin and ubiquitinates histones and other chromatin-associated proteins located around the DNA lesion. Promotes the removal of ubiquitinated histones from the nucleosome and subsequent DNA repair.                                                                                                    |
